# Supplementary figures and images for: Capillary Regression, A Key Pathogenic Feature of COVID-19 Infection?
Source: Preprints.org preprint supplement (doi:10.20944/preprints202006.0115.v1), 2020-06-09

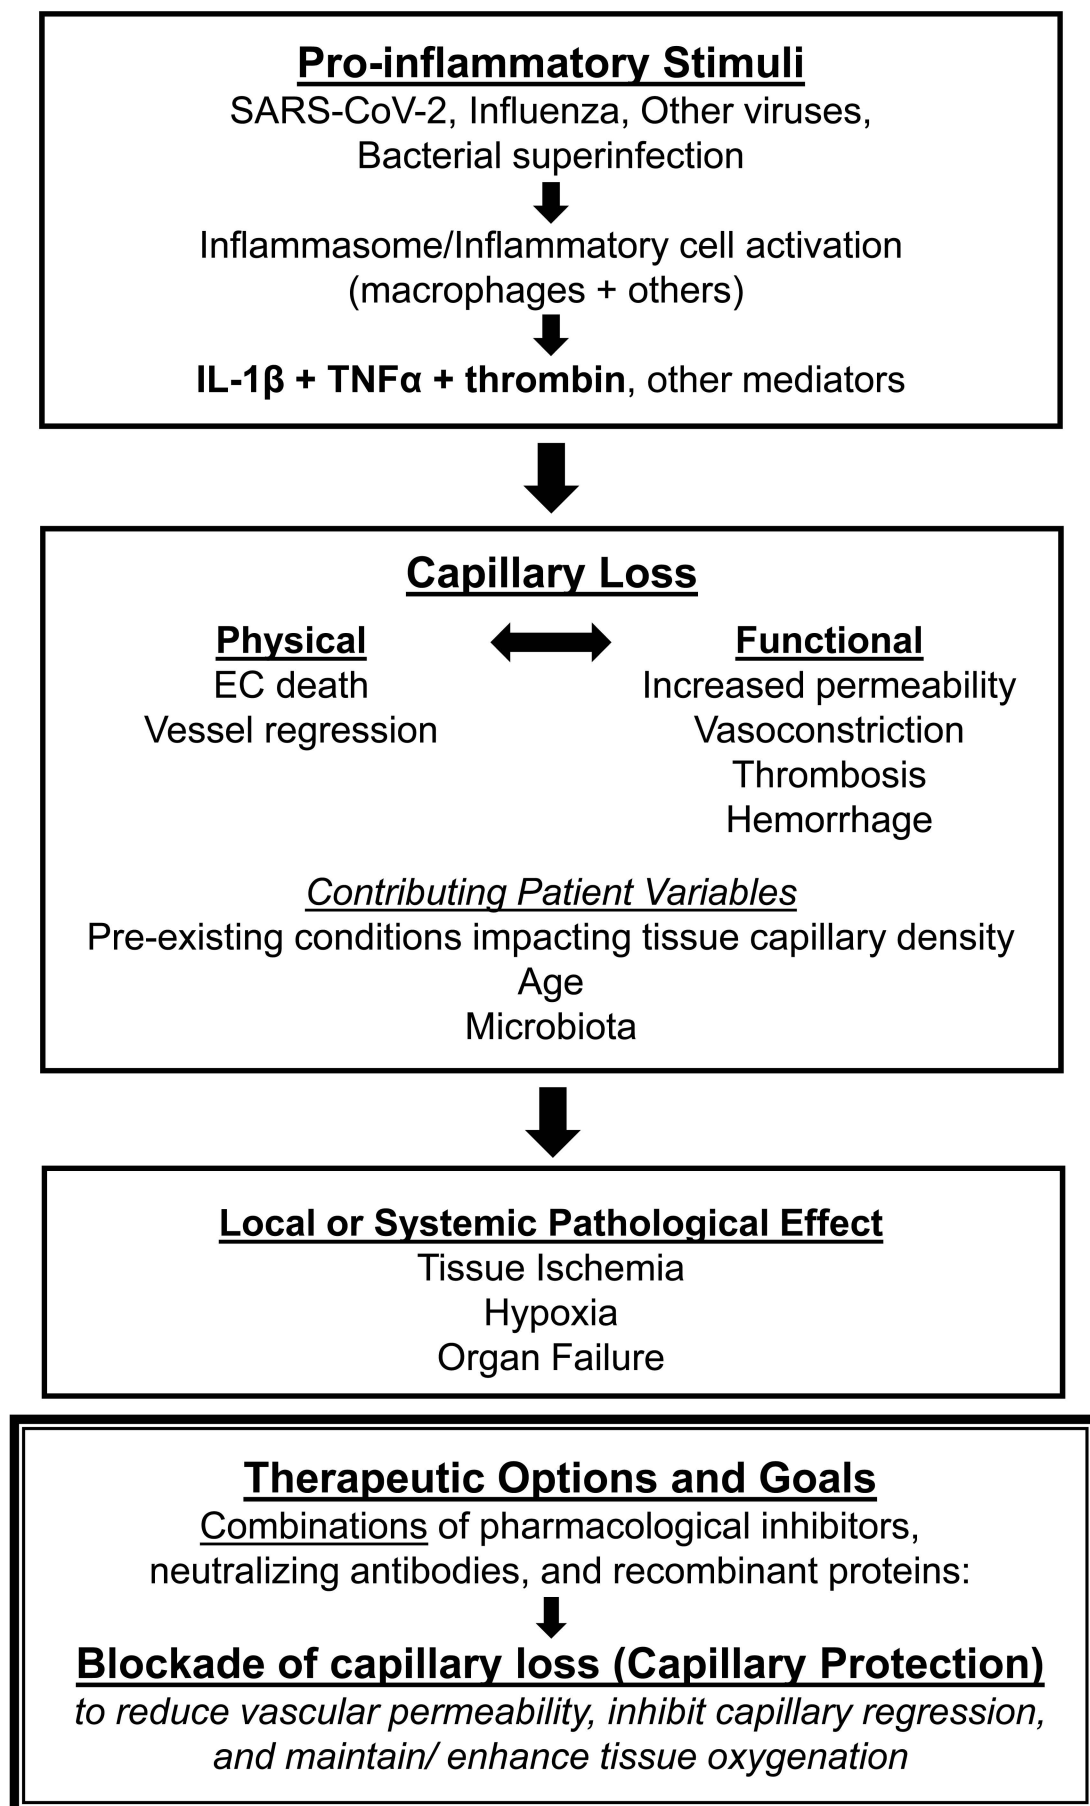

Figure 1

Supplement: Supplementary file 1 [file supplementary]
